# Supplementary material for: Determination of inorganic anions in oilfield water using capillary electrophoresis with indirect fluorescence detection
Source: Royal Society of Chemistry journal article supplement (doi:10.1039/c5ay01394a), 2015-01-01
Supplement: c5ay01394a1.pdf [file c5ay01394a1.pdf]

Supplementary Material for

**Determination of Inorganic Anions in Oilfield Water Using Capillary Electrophoresis  
with Indirect Fluorescence Detection**

Lei Pei, Kenneth J. Schmidt, H. John Crabtree and Charles A. Lucy

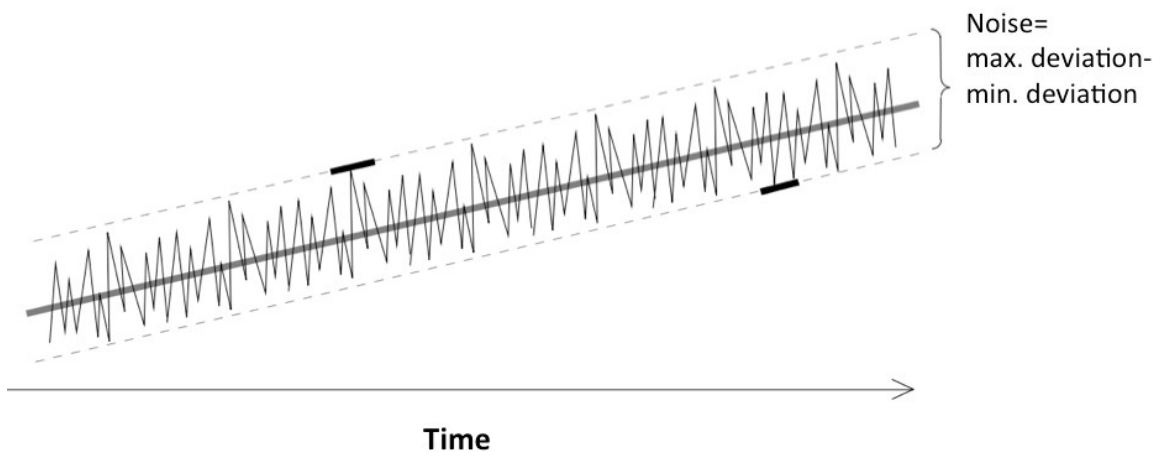

**Figure S1** Demonstration of noise calculation used to assess stability of light sources (Section 2.3). Adapted from ref. 59

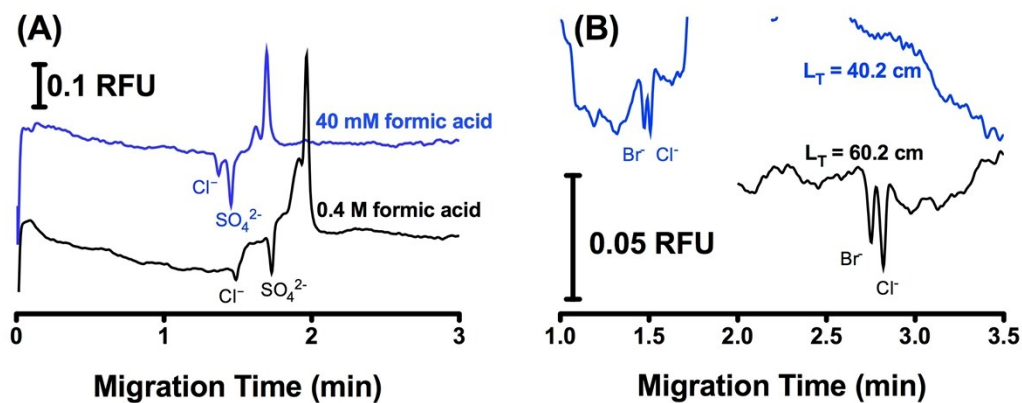

**Figure S2** Optimization of (A) formic acid concentration and (B) capillary length.

Conditions: (A) sample, 2 ppm Cl<sup>-</sup>, 5 ppm SO<sub>4</sub><sup>2-</sup>; capillary, L<sub>T</sub> 40.2 cm, L<sub>D</sub> 30 cm, I.D. 50 μm; voltage, -15 kV; electrolyte, 10 μM HPTS and formic acid, concentration as indicated in the electropherogram. (B) sample, 10 ppm Br<sup>-</sup>, 10 ppm Cl<sup>-</sup>; capillary, L<sub>T</sub> as indicated in the electropherogram. L<sub>D</sub> = L<sub>T</sub> - 10 cm; voltage, -23 kV; electrolyte, 10 μM HPTS and 0.4 M formic acid, pH 2.0; detection, λ<sub>excitation</sub> = 405 nm and λ<sub>emission</sub> = 520 nm.

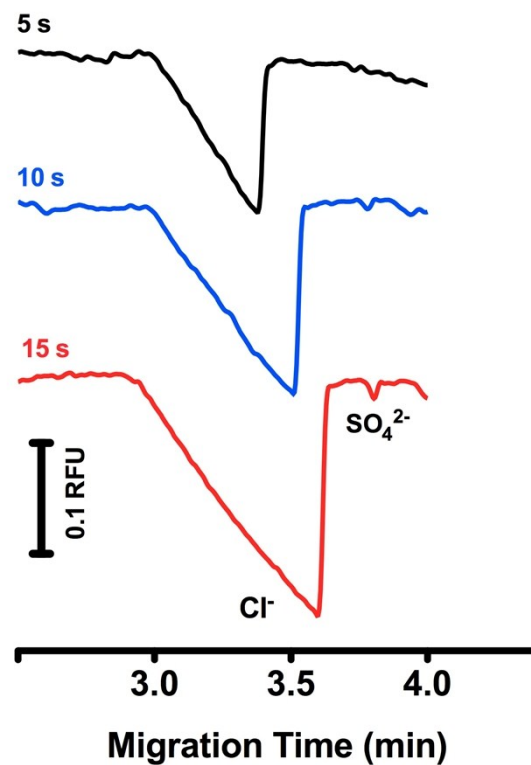

**Figure S3** Effect of injection time on sulfate determination in high salinity sample.

Conditions: sample, 0.5 ppm sulfate with 500 ppm chloride; injection, 0.5 psi for time indicated on the figure; electrolyte, 10  $\mu$ M HPTS and 0.4 M formic acid, pH 2.0; capillary,  $L_T$  60.2 cm,  $L_D$  50 cm, I.D. 50  $\mu$ m; voltage, -22.5 kV; and detection:  $\lambda_{\text{excitation}} = 405$  nm and  $\lambda_{\text{emission}} = 520$  nm.
